# Supplementary material for: Catalytic activity of anionic Au–Ag dimer for nitric oxide oxidation: a DFT study
Source: Royal Society of Chemistry journal article supplement (doi:10.1039/c4nj01328j), 2015-01-01
Supplement: c4nj01328j1.pdf [file c4nj01328j1.pdf]

## Electronic Supplementary Information (ESI)

### **Catalytic Activity of Anionic Au-Ag Dimer for Nitric Oxide Oxidation: A DFT Study**

Debajyoti Bhattacharjee<sup>1</sup>, Bhupesh Kumar Mishra<sup>1,2</sup>, Arup Kumar Chakrabartty<sup>1</sup> and Ramesh Ch. Deka<sup>1\*</sup>

<sup>1</sup>Department of Chemical Sciences, Tezpur University Tezpur, Napaam, 784 028, Assam, India.

<sup>2</sup>Department of Chemistry, D.N. Government College, Itanagar, Arunachal Pradesh-791113, India

\*Corresponding author. Tel.: +91 3712267008; Fax: +91 3712 267005

*E-mail address:* [ramesh@tezu.ernet.in](mailto:ramesh@tezu.ernet.in)

**Table S1:** Binding energies for different binding orientations of O<sub>2</sub> and NO with Au-Ag<sup>-</sup> dimer

| Structure                                                                           | Binding Energy (in eV) |
|-------------------------------------------------------------------------------------|------------------------|
| 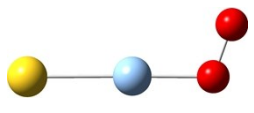   | 1.73                   |
|    | 1.16                   |
|    | 0.03                   |
|   | 1.14                   |
|  | 0.77                   |
|  | 0.56                   |
|  | 0.08                   |

**Table S2:** Relative energies of different species with various spin multiplicities.

| AuAg <sup>-</sup> |                         | AuAg-NO         |                         | AuAg <sup>-</sup> O <sub>2</sub> |                         |
|-------------------|-------------------------|-----------------|-------------------------|----------------------------------|-------------------------|
| Multiplicity, S   | Relative Energy (in eV) | Multiplicity, S | Relative Energy (in eV) | Multiplicity, S                  | Relative Energy (in eV) |
| 2                 | 0.00                    | 1               | 0.00                    | 2                                | 0.00                    |
| 4                 | 2.09                    | 3               | 0.21                    | 4                                | 2.35                    |
| 6                 | 7.91                    |                 |                         |                                  |                         |

**Table S3:** Total spin densities of the initial structures

| Species                              | Total Spin Densities |
|--------------------------------------|----------------------|
| AuAg <sup>-</sup>                    | 1                    |
| Au-Ag <sup>-</sup> O <sub>2</sub>    | 1                    |
| Au-Ag <sup>-</sup> NO                | 0                    |
| Au-Ag <sup>-</sup> O <sub>2</sub> NO | 0                    |
| Au-Ag <sup>-</sup> NOO <sub>2</sub>  | 0                    |

**Table S4:** Comparison of energies for various species ( $E_{(\text{LANL2DZ-LANL2TZ(f)})}$ ) using LANL2DZ and LANL2TZ(f) basis sets on the metal centers.

| Species                   | $E_{(\text{LANL2DZ-LANL2TZ(f)})}$ (in eV) |
|---------------------------|-------------------------------------------|
| Au-Ag-NO                  | 0.25                                      |
| Au-Ag-NOO <sub>2</sub>    | 0.32                                      |
| Au-Ag-NOO <sub>2</sub> NO | 0.35                                      |
| Au-Ag-O <sub>2</sub>      | 0.33                                      |
| Au-Ag-O <sub>2</sub> NO   | 0.30                                      |
| Au-Ag-O                   | 0.37                                      |
| Au-Ag-ONO                 | 0.33                                      |
| TS1                       | 0.32                                      |
| TS2                       | 0.34                                      |
| TS3                       | 0.31                                      |
